# Supplementary material for: Association Between Change in Metabolic Syndrome Status and Risk of Incident Atrial Fibrillation: A Nationwide Population‐Based Study
Source: PubMed Central journal article supplement — J Am Heart Assoc. 2021 Aug 7;10(16):e020901. doi: 10.1161/JAHA.121.020901 (PMC8475027; doi:10.1161/jaha.121.020901), 2021-08-07

# **Supplemental Material**

**Table S1. Definitions of comorbidities.**

| <b>Diagnosis</b>                      | <b>ICD-10-CM code and definition</b>                                                                                                                                                                                                           |
|---------------------------------------|------------------------------------------------------------------------------------------------------------------------------------------------------------------------------------------------------------------------------------------------|
| Hypertension*                         | I10-I13, I15; and minimum 1 prescription of anti-hypertensive drug (thiazide, loop diuretics, aldosterone antagonist, alpha-/beta-blocker, calcium-channel blocker, angiotensin-converting enzyme inhibitor, angiotensin II receptor blocker). |
| Diabetes mellitus <sup>†</sup>        | E11-E14; and minimum 1 prescription of anti-diabetic drugs (sulfonylureas, metformin, meglitinides, thiazolidinediones, dipeptidyl peptidase-4 inhibitors, $\alpha$ -glucosidase inhibitors, and insulin).                                     |
| Liver cirrhosis                       | K74, K70.3, K70.4                                                                                                                                                                                                                              |
| Stroke                                | I63, I64                                                                                                                                                                                                                                       |
| Transient ischemic attack             | G458, G459                                                                                                                                                                                                                                     |
| Thromboembolism                       | I74                                                                                                                                                                                                                                            |
| Myocardial infarction <sup>†</sup>    | I21-22                                                                                                                                                                                                                                         |
| Congestive heart failure <sup>†</sup> | I50                                                                                                                                                                                                                                            |
| Peripheral arterial disease*          | I70, I73                                                                                                                                                                                                                                       |

\*  $\geq 1$  diagnosis during hospitalization, or  $\geq 2$  diagnoses at outpatient clinic, in the previous 1 year

<sup>†</sup>  $\geq 1$  diagnosis during hospitalization or at outpatient clinic, in the previous 1 year

ICD-10-CM, the International Classification of Disease, Tenth Revision, Clinical Modification;

**Table S2. AF risk according to each of metabolic syndrome component variation.**

|                                                  | Patients, n | AF cases, n | AF incidence<br>(1000 person-<br>year) | Total               |                     |
|--------------------------------------------------|-------------|-------------|----------------------------------------|---------------------|---------------------|
|                                                  |             |             |                                        | HR (95% CI)*        |                     |
|                                                  |             |             |                                        | Model1              | Model2              |
| <b>Metabolic syndrome<sup>†</sup></b>            |             |             |                                        |                     |                     |
| HH                                               | 4,769,968   | 55,975      | 1.481                                  | 1(reference)        | 1(reference)        |
| HM                                               | 608,158     | 14,090      | 2.944                                  | 1.237 (1.214-1.26)  | 1.155 (1.134-1.178) |
| MH                                               | 798,555     | 18,969      | 3.022                                  | 1.335 (1.313-1.357) | 1.259 (1.238-1.28)  |
| MM                                               | 1,388,850   | 46,566      | 4.300                                  | 1.454 (1.435-1.473) | 1.308 (1.29-1.327)  |
| <b>Increased waist circumference<sup>‡</sup></b> |             |             |                                        |                     |                     |
| HH                                               | 5,557,418   | 79,689      | 1.814                                  | 1(reference)        | 1(reference)        |
| HU                                               | 484,393     | 12,837      | 3.380                                  | 1.266 (1.242-1.29)  | 1.175 (1.151-1.198) |
| UH                                               | 559,475     | 12,830      | 2.916                                  | 1.247 (1.224-1.27)  | 1.171 (1.148-1.194) |
| UU                                               | 964,245     | 30,244      | 4.009                                  | 1.485 (1.465-1.505) | 1.312 (1.289-1.335) |
| <b>High blood pressure<sup>‡</sup></b>           |             |             |                                        |                     |                     |
| HH                                               | 3,322,639   | 29,858      | 1.134                                  | 1(reference)        | 1(reference)        |
| HU                                               | 823,877     | 13,006      | 1.995                                  | 1.234 (1.209-1.26)  | 1.183 (1.158-1.208) |
| UH                                               | 963,237     | 15,906      | 2.085                                  | 1.264 (1.24-1.289)  | 1.214 (1.191-1.238) |
| UU                                               | 2,455,778   | 76,830      | 4.003                                  | 1.581 (1.559-1.604) | 1.462 (1.441-1.484) |
| <b>High fasting glucose<sup>‡</sup></b>          |             |             |                                        |                     |                     |
| HH                                               | 4,259,720   | 57,708      | 1.711                                  | 1(reference)        | 1(reference)        |
| HU                                               | 865,970     | 16,787      | 2.456                                  | 1.112 (1.093-1.131) | 1.078 (1.06-1.097)  |
| UH                                               | 993,115     | 19,877      | 2.539                                  | 1.136 (1.118-1.155) | 1.098 (1.08-1.115)  |
| UU                                               | 1,446,726   | 41,228      | 3.656                                  | 1.197 (1.182-1.213) | 1.122 (1.107-1.137) |

|                                      |           |        |       |                     |                     |  |
|--------------------------------------|-----------|--------|-------|---------------------|---------------------|--|
| <b>High triglyceride<sup>‡</sup></b> |           |        |       |                     |                     |  |
| HH                                   | 3,968,673 | 55,786 | 1.780 | 1(reference)        | 1(reference)        |  |
| HU                                   | 783,301   | 15,546 | 2.515 | 1.05 (1.031-1.069)  | 0.987 (0.97-1.005)  |  |
| UH                                   | 947,270   | 19,548 | 2.615 | 1.162 (1.14-1.181)  | 1.107 (1.089-1.125) |  |
| UU                                   | 1,866,287 | 44,720 | 3.046 | 1.147 (1.133-1.162) | 1.047 (1.033-1.06)  |  |
| <b>Low HDL-C<sup>‡</sup></b>         |           |        |       |                     |                     |  |
| HH                                   | 4,621,611 | 62,431 | 1.707 | 1(reference)        | 1(reference)        |  |
| HU                                   | 737,844   | 14,542 | 2.493 | 1.125 (1.105-1.146) | 1.087 (1.067-1.107) |  |
| UH                                   | 879,956   | 20,889 | 3.028 | 1.29 (1.27-1.311)   | 1.242 (1.223-1.262) |  |
| UU                                   | 1,326,120 | 37,738 | 3.637 | 1.284 (1.267-1.302) | 1.212 (1.196-1.229) |  |
| <b>Obesity</b>                       |           |        |       |                     |                     |  |
| HH                                   | 4,710,947 | 73,095 | 1.966 | 1(reference)        | 1(reference)        |  |
| HU                                   | 356,409   | 8,444  | 3.017 | 1.209 (1.182-1.236) | 1.207 (1.18-1.235)  |  |
| UH                                   | 428,876   | 7,654  | 2.256 | 1.164 (1.137-1.192) | 1.162 (1.135-1.19)  |  |
| UU                                   | 2,069,299 | 46,407 | 2.847 | 1.328 (1.313-1.344) | 1.324 (1.309-1.34)  |  |

\*The associations were tested using a Cox proportional hazards model adjusted for multivariable.

Model 1: adjusted for age, sex

Model 2: adjusted for age, sex, alcohol consumption, smoking status, physical activity, and BMI.

<sup>‡</sup>Subjects stratified into four groups according to the change of metabolic syndrome status as follows: MM, patients who were in MetS in both health checkups; HM, healthy in first checkup but newly diagnosis as MetS in the second checkup; MH, MetS in the first exam but changed to healthy in the second checkup; and HH, healthy in both checkups.

<sup>‡</sup>The components of metabolic syndrome were defined based on the AHA/NHLBI definition for Asian populations as follows: 1) waist circumference  $\geq 85$  cm in women or  $\geq 90$  cm in men, 2) serum triglycerides  $\geq 150$  mg/dL, 3) serum high-density lipoprotein (HDL) cholesterol  $< 50$  mg/dL in women or  $< 40$  mg/dL in men, 4) systolic BP  $\geq 130$  mmHg or diastolic BP  $\geq 85$  mmHg or drug treatment for elevated BP, and 5) fasting serum glucose  $\geq 100$  mg/dL or drug treatment for elevated blood glucose. Subjects stratified into four groups according to the change of relevant component of metabolic syndrome as follows: UU, metabolically unhealthy of relevant component in both checkups; UH, metabolically unhealthy of relevant component in the first exam but changed to healthy in the second checkup; HU, metabolically healthy of relevant component in the first exam but changed to unhealthy in the second checkup; and HH, metabolically healthy of relevant component in both checkups

AF, atrial fibrillation; AHA/NHLBI, American Heart Association/National Heart, Lung, and Blood Institute; BP, blood pressure; HR, hazard ratio; HDL-C, high-density lipoprotein cholesterol; MetS, metabolic syndrome

**Table S3. AF risk according to change of MetS status and each of MetS component variation including 3rd health examination.**

|                                        |                 | 3rd exam status | Patients, n | AF cases, n | Total                                         | AF incidence<br>(1000 person-<br>year) | HR (95% C.I)*      |                     |
|----------------------------------------|-----------------|-----------------|-------------|-------------|-----------------------------------------------|----------------------------------------|--------------------|---------------------|
|                                        |                 |                 |             |             | Average<br>duration<br>to 3rd exam<br>(years) |                                        | Model1             | Model2              |
| <b>Metabolic syndrome<sup>†</sup></b>  |                 |                 |             |             |                                               |                                        |                    |                     |
| HH                                     | Healthy (HHH)   |                 | 2,516,994   | 15,928      | 1.999                                         | 1.578                                  | 1 (reference)      | 1 (reference)       |
|                                        | MetS (HHM)      |                 | 321,126     | 3,953       | 2.000                                         | 3.077                                  | 1.323(1.277-1.37)  | 1.251 (1.208-1.296) |
| HM                                     | Healthy (HMH)   |                 | 203,964     | 2,213       | 2.000                                         | 2.702                                  | 1.16(1.109-1.213)  | 1.092 (1.044-1.142) |
|                                        | MetS (HMM)      |                 | 234,198     | 3,399       | 2.000                                         | 3.641                                  | 1.335(1.286-1.386) | 1.226 (1.18-1.274)  |
| MH                                     | Healthy (MHH)   |                 | 188,865     | 2,280       | 2.000                                         | 3.004                                  | 1.189(1.138-1.243) | 1.109(1.06,1.159)   |
|                                        | MetS (MHM)      |                 | 143,037     | 2,168       | 2.000                                         | 3.790                                  | 1.338(1.279-1.4)   | 1.21 (1.155-1.267)  |
| MM                                     | Healthy (MMH)   |                 | 117,437     | 1,831       | 2.002                                         | 3.904                                  | 1.346(1.282-1.413) | 1.218 (1.159-1.28)  |
|                                        | MetS (MMM)      |                 | 577,419     | 11,191      | 2.001                                         | 4.897                                  | 1.448(1.412-1.485) | 1.273 (1.238-1.309) |
| <b>Waist circumference<sup>†</sup></b> |                 |                 |             |             |                                               |                                        |                    |                     |
| HH                                     | Healthy (HHH)   |                 | 2,968,293   | 23,114      | 1.999                                         | 1.942                                  | 1 (reference)      | 1 (reference)       |
|                                        | Unhealthy (HHU) |                 | 223,322     | 2,369       | 2.001                                         | 2.652                                  | 1.159(1.111-1.209) | 1.112 (1.065-1.161) |
| HU                                     | Healthy (HUH)   |                 | 163,299     | 2,301       | 2.001                                         | 3.035                                  | 1.171(1.118-1.226) | 1.122 (1.07-1.176)  |
|                                        | Unhealthy (HUU) |                 | 104,462     | 1,602       | 2.000                                         | 3.438                                  | 1.388(1.327-1.453) | 1.303 (1.243-1.366) |
| UH                                     | Healthy (UHH)   |                 | 162,536     | 1,966       | 2.000                                         | 3.538                                  | 1.222(1.17-1.276)  | 1.159 (1.108-1.212) |
|                                        | Unhealthy (UHU) |                 | 149,905     | 2,054       | 2.001                                         | 3.852                                  | 1.337(1.27-1.406)  | 1.242 (1.177-1.31)  |
| UU                                     | Healthy (UUH)   |                 | 107,648     | 1,819       | 2.002                                         | 4.250                                  | 1.392(1.327-1.46)  | 1.292 (1.228-1.359) |
|                                        | Unhealthy (UUU) |                 | 423,575     | 7,738       | 2.001                                         | 4.603                                  | 1.596(1.555-1.638) | 1.436 (1.387-1.488) |
| <b>Blood pressure<sup>†</sup></b>      |                 |                 |             |             |                                               |                                        |                    |                     |
| HH                                     | Healthy (HHH)   |                 | 1,579,083   | 7,456       | 1.999                                         | 1.183                                  | 1 (reference)      | 1 (reference)       |
|                                        | Unhealthy (HHU) |                 | 314,829     | 2,569       | 2.002                                         | 2.029                                  | 1.257(1.202-1.315) | 1.208 (1.155-1.264) |

|                                    |                 |           |        |       |       |                    |                     |
|------------------------------------|-----------------|-----------|--------|-------|-------|--------------------|---------------------|
| HU                                 | Healthy (HUH)   | 273,388   | 1,927  | 1.998 | 1.744 | 1.124(1.069-1.182) | 1.082 (1.029-1.138) |
|                                    | Unhealthy (HUU) | 287,788   | 3,042  | 2.000 | 2.628 | 1.311(1.256-1.368) | 1.232 (1.18-1.286)  |
| UH                                 | Healthy (UHH)   | 271,919   | 2,062  | 1.999 | 1.882 | 1.197(1.14-1.257)  | 1.148 (1.093-1.206) |
|                                    | Unhealthy (UHU) | 203,678   | 2,197  | 2.001 | 2.681 | 1.353(1.289-1.419) | 1.267 (1.208-1.33)  |
| UU                                 | Healthy (UUH)   | 198,680   | 1,997  | 1.998 | 2.497 | 1.281(1.219-1.347) | 1.203 (1.144-1.265) |
|                                    | Unhealthy (UUU) | 1,173,675 | 21,713 | 2.000 | 4.650 | 1.618(1.573-1.664) | 1.474 (1.432-1.518) |
| <b>Fasting glucose<sup>‡</sup></b> |                 |           |        |       |       |                    |                     |
| HH                                 | Healthy (HHH)   | 2,030,296 | 14,521 | 2.000 | 1.782 | 1 (reference)      | 1 (reference)       |
|                                    | Unhealthy (HHU) | 421,751   | 4,341  | 2.002 | 2.572 | 1.146(1.108-1.185) | 1.11 (1.073-1.148)  |
| HU                                 | Healthy (HUH)   | 299,416   | 2,895  | 1.999 | 2.404 | 1.086(1.043-1.13)  | 1.056 (1.015-1.1)   |
|                                    | Unhealthy (HUU) | 264,350   | 3,256  | 2.000 | 3.087 | 1.173(1.13-1.219)  | 1.108 (1.066-1.151) |
| UH                                 | Healthy (UHH)   | 306,328   | 3,136  | 1.999 | 2.543 | 1.134(1.091-1.178) | 1.103 (1.061-1.146) |
|                                    | Unhealthy (UHU) | 184,198   | 2,321  | 2.002 | 3.158 | 1.194(1.143-1.248) | 1.133 (1.084-1.184) |
| UU                                 | Healthy (UUH)   | 146,457   | 1,822  | 1.998 | 3.113 | 1.189(1.133-1.249) | 1.134 (1.08-1.191)  |
|                                    | Unhealthy (UUU) | 650,244   | 10,671 | 2.000 | 4.156 | 1.2(1.17-1.231)    | 1.11 (1.081-1.139)  |
| <b>Triglycerid<sup>‡</sup></b>     |                 |           |        |       |       |                    |                     |
| HH                                 | Healthy (HHH)   | 1,918,375 | 14,430 | 2.000 | 1.886 | 1 (reference)      | 1 (reference)       |
|                                    | Unhealthy (HHU) | 338,739   | 3,782  | 1.998 | 2.785 | 1.186(1.144-1.229) | 1.135 (1.094-1.176) |
| HU                                 | Healthy (HUH)   | 248,601   | 2,502  | 2.002 | 2.503 | 1.095(1.05-1.143)  | 1.043 (1-1.089)     |
|                                    | Unhealthy (HUU) | 288,808   | 3,442  | 2.000 | 2.966 | 1.14(1.098-1.183)  | 1.063 (1.023-1.103) |
| UH                                 | Healthy (UHH)   | 251,683   | 2,648  | 1.999 | 2.618 | 1.027(0.986-1.071) | 0.965 (0.925-1.006) |
|                                    | Unhealthy (UHU) | 197,378   | 2,334  | 1.999 | 2.941 | 1.11(1.062-1.159)  | 1.017 (0.973-1.062) |
| UU                                 | Healthy (UUH)   | 185,943   | 2,114  | 2.002 | 2.827 | 1.041(0.994-1.089) | 0.951 (0.908-0.996) |
|                                    | Unhealthy (UUU) | 873,513   | 11,711 | 2.001 | 3.350 | 1.144(1.116-1.172) | 1.024 (0.998-1.051) |
| <b>HDL cholesterol<sup>‡</sup></b> |                 |           |        |       |       |                    |                     |
| HH                                 | Healthy (HHH)   | 2,333,926 | 16,901 | 2.000 | 1.804 | 1 (reference)      | 1 (reference)       |

|                            |                 |           |        |       |       |                    |                     |
|----------------------------|-----------------|-----------|--------|-------|-------|--------------------|---------------------|
|                            | Unhealthy (HHU) | 349,510   | 4,361  | 1.997 | 3.132 | 1.252(1.211-1.295) | 1.204 (1.164-1.245) |
| HU                         | Healthy (HUH)   | 222,248   | 2,254  | 2.002 | 2.543 | 1.1(1.052-1.149)   | 1.061 (1.015-1.109) |
|                            | Unhealthy (HUU) | 259,706   | 3,598  | 2.000 | 3.488 | 1.204(1.161-1.249) | 1.137 (1.096-1.18)  |
| UH                         | Healthy (UHH)   | 257,564   | 2,628  | 2.001 | 2.533 | 1.105(1.06-1.151)  | 1.069 (1.025-1.114) |
|                            | Unhealthy (UHU) | 157,821   | 2,073  | 1.999 | 3.277 | 1.192(1.138-1.248) | 1.124 (1.073-1.177) |
| UU                         | Healthy (UUH)   | 141,876   | 1,685  | 2.003 | 2.966 | 1.121(1.065-1.179) | 1.061 (1.009-1.117) |
|                            | Unhealthy (UUU) | 580,389   | 9,463  | 2.001 | 4.112 | 1.252(1.211-1.295) | 1.16 (1.128-1.192)  |
| <b>Obesity<sup>†</sup></b> |                 |           |        |       |       |                    |                     |
| HH                         | Healthy (HHH)   | 2,522,301 | 21,715 | 1.999 | 2.152 | 1 (reference)      | 1 (reference)       |
|                            | Unhealthy (HHU) | 153,664   | 1,391  | 2.002 | 2.246 | 1.194(1.131-1.26)  | 1.117 (1.057-1.18)  |
| HU                         | Healthy (HUH)   | 92,445    | 1,062  | 1.998 | 2.862 | 1.197(1.125-1.273) | 1.114 (1.046-1.185) |
|                            | Unhealthy (HUU) | 154,475   | 1,407  | 1.999 | 2.262 | 1.178(1.116-1.244) | 1.09 (1.031-1.152)  |
| UH                         | Healthy (UHH)   | 113,659   | 1,458  | 2.000 | 3.216 | 1.125(1.067-1.186) | 0.99 (0.936-1.047)  |
|                            | Unhealthy (UHU) | 84,992    | 1,026  | 2.001 | 3.016 | 1.226(1.152-1.306) | 1.07 (1.001-1.142)  |
| UU                         | Healthy (UUH)   | 107,909   | 1,492  | 2.000 | 3.467 | 1.237(1.174-1.304) | 1.075 (1.016-1.138) |
|                            | Unhealthy (UUU) | 1,073,595 | 13,412 | 2.001 | 3.126 | 1.376(1.347-1.406) | 1.131 (1.09-1.174)  |

\*The associations were tested using a Cox proportional hazards model adjusted for multivariable.

Model 1: adjusted for age, sex

Model 2: adjusted for age, sex, alcohol consumption, smoking status, physical activity, and BMI. <sup>†</sup> Subjects stratified into four groups according to the change of metabolic syndrome status as follows: MM, patients who were in MetS in both health check-ups; HM, healthy in the first check-up but newly diagnosis as MetS in the second check-up; MH, MetS in the first exam but changed to healthy in the second check-up; and HH, healthy in both check-ups.

<sup>‡</sup> The components of metabolic syndrome were defined based on the AHA/NHLBI definition for Asian populations as follows: 1) waist circumference  $\geq 85$  cm in women or  $\geq 90$  cm in men, 2) serum triglycerides  $\geq 150$  mg/dL, 3) serum high-density lipoprotein (HDL) cholesterol  $< 50$  mg/dL in women or  $< 40$  mg/dL in men, 4) systolic BP  $\geq 130$  mmHg or diastolic BP  $\geq 85$  mmHg or drug treatment for elevated BP, and 5) fasting serum glucose  $\geq 100$  mg/dL or drug treatment for elevated blood glucose. Subjects stratified into four groups according to the change of relevant component of metabolic syndrome as follows: UU, metabolically unhealthy of a relevant component in both check-ups; UH, metabolically unhealthy of a relevant component in the first exam but changed to healthy in the second check-up; HU, metabolically healthy of a relevant component in the first exam but changed to unhealthy in the second check-up; and HH, metabolically healthy of a relevant component in both check-ups

AF, atrial fibrillation; AHA/NHLBI, American Heart Association/National Heart, Lung, and Blood Institute; BP, blood pressure; HR, hazard ratio; HDL-C, high-density lipoprotein cholesterol; MetS, metabolic syndrome



**Table S4. AF risk according to the number of metabolic syndrome components.**

| No. of MetS components |                 | Total, N  | AF patients      | AF incidence | HR (95% C.I)*      |                    |
|------------------------|-----------------|-----------|------------------|--------------|--------------------|--------------------|
| At first visit         | At second visit |           |                  |              | Model1             | Model2             |
| 1 ≤                    | 1 ≤             | 3,058,312 | 27,304<br>(0.9%) | 1.2804       | 1(ref.)            | 1(ref.)            |
|                        | 2               | 675,135   | 10,144<br>(1.5%) | 2.15799      | 1.201(1.173,1.229) | 1.164(1.138,1.192) |
|                        | 3               | 250,868   | 4,841 (1.9%)     | 2.77969      | 1.374(1.332,1.417) | 1.316(1.275,1.357) |
|                        | ≥ 4             | 73,572    | 1,910 (2.6%)     | 3.75495      | 1.555(1.483,1.63)  | 1.465(1.397,1.536) |
| 2                      | 1 ≤             | 585,312   | 8,782 (1.5%)     | 2.15185      | 1.151(1.124,1.18)  | 1.108(1.081,1.136) |
|                        | 2               | 542,136   | 11,269<br>(2.1%) | 2.99529      | 1.32(1.291,1.35)   | 1.246(1.218,1.275) |
|                        | 3               | 331,180   | 7,708 (2.3%)     | 3.36023      | 1.417(1.381,1.454) | 1.321(1.286,1.356) |
|                        | ≥ 4             | 158,186   | 4,945 (3.1%)     | 4.53596      | 1.657(1.606,1.709) | 1.516(1.469,1.565) |
| 3                      | 1 ≤             | 184,728   | 3,498 (1.9%)     | 2.72008      | 1.255(1.212,1.301) | 1.193(1.151,1.236) |
|                        | 2               | 285,411   | 6,699 (2.3%)     | 3.38526      | 1.359(1.322,1.396) | 1.26(1.225,1.296)  |
|                        | 3               | 373,107   | 10,231<br>(2.7%) | 3.97116      | 1.493(1.459,1.528) | 1.371(1.338,1.405) |
|                        | ≥ 4             | 272,184   | 8,851 (3.3%)     | 4.72205      | 1.626(1.587,1.667) | 1.473(1.435,1.512) |
| ≥ 4                    | 1 ≤             | 45,269    | 1,097 (2.4%)     | 3.49307      | 1.39(1.308,1.477)  | 1.285(1.209,1.367) |
|                        | 2               | 108,156   | 3,222 (3.0%)     | 4.30935      | 1.526(1.471,1.584) | 1.394(1.342,1.448) |
|                        | 3               | 218,006   | 7,151 (3.3%)     | 4.76058      | 1.581(1.539,1.624) | 1.432(1.392,1.472) |
|                        | ≥ 4             | 556,633   | 21,653<br>(3.9%) | 5.67899      | 1.717(1.685,1.75)  | 1.523(1.492,1.556) |

\*The associations were tested using a Cox proportional hazards model adjusted for multivariable.

Model 1: adjusted for age, sex

Model 2: adjusted for age, sex, alcohol consumption, smoking status, physical activity, and BMI.

AF, atrial fibrillation; HR, hazard ratio

**Table S5. AF risk according to each of metabolic syndrome component changes by age.**

| AGE                                    | 20-39       |              |                     |                     | 40-64       |              |                     |                     | ≥65         |              |                     |                     |
|----------------------------------------|-------------|--------------|---------------------|---------------------|-------------|--------------|---------------------|---------------------|-------------|--------------|---------------------|---------------------|
|                                        | AF patients | AF incidence | HR(95%CI)*          |                     | AF patients | AF incidence | HR(95%CI)           |                     | AF patients | AF incidence | HR(95%CI)           |                     |
|                                        |             |              | Model1              | Model2              |             |              | Model1              | Model2              |             |              | Model1              | Model2              |
| <b>Metabolic syndrome<sup>†</sup></b>  |             |              |                     |                     |             |              |                     |                     |             |              |                     |                     |
| HH                                     | 7,481       | 0.54783      | 1 (Reference)       | 1 (Reference)       | 31,187      | 1.74169      | 1 (Reference)       | 1 (Reference)       | 18,831      | 8.16341      | 1 (Reference)       | 1 (Reference)       |
| HM                                     | 1,058       | 0.88134      | 1.398 (1.296-1.509) | 1.34 (1.238-1.45)   | 10,142      | 2.85216      | 1.262 (1.229-1.295) | 1.179 (1.148-1.21)  | 8,204       | 9.3446       | 1.142 (1.11-1.175)  | 1.078 (1.047-1.11)  |
| MH                                     | 775         | 0.8928       | 1.414 (1.324-1.51)  | 1.363 (1.273-1.46)  | 7,206       | 2.65229      | 1.383 (1.352-1.415) | 1.306 (1.276-1.336) | 6,535       | 8.81161      | 1.218 (1.186-1.251) | 1.16 (1.13-1.192)   |
| MM                                     | 1,131       | 1.11471      | 1.679 (1.574-1.791) | 1.571 (1.46-1.691)  | 22,267      | 3.63906      | 1.573 (1.546-1.602) | 1.413(1.385-1.442)  | 24,488      | 9.3033       | 1.261 (1.236-1.286) | 1.146 (1.122-1.171) |
| <b>Waist circumference<sup>‡</sup></b> |             |              |                     |                     |             |              |                     |                     |             |              |                     |                     |
| HH                                     | 7,658       | 0.5655       | 1 (Reference)       | 1 (Reference)       | 43,439      | 1.9653       | 1 (Reference)       | 1 (Reference)       | 30,749      | 8.1027       | 1 (Reference)       | 1 (Reference)       |
| HU                                     | 804         | 0.7706       | 1.228 (1.123-1.343) | 1.166 (1.059-1.282) | 6,582       | 2.9225       | 1.288 (1.254-1.324) | 1.188 (1.154-1.223) | 5,770       | 8.8869       | 1.148 (1.115-1.181) | 1.143 (1.11-1.176)  |
| UH                                     | 526         | 0.7753       | 1.241 (1.153-1.337) | 1.195 (1.105-1.292) | 6,142       | 2.9932       | 1.314 (1.28-1.349)  | 1.228 (1.195-1.262) | 6,546       | 9.4923       | 1.216 (1.183-1.249) | 1.109 (1.058-1.123) |
| UU                                     | 1,457       | 0.9874       | 1.514 (1.429-1.603) | 1.404 (1.301-1.517) | 14,639      | 3.7625       | 1.571 (1.542-1.602) | 1.373 (1.339-1.409) | 14,993      | 10.5234      | 1.362 (1.335-1.389) | 1.223 (1.191-1.256) |
| <b>Blood pressure<sup>‡</sup></b>      |             |              |                     |                     |             |              |                     |                     |             |              |                     |                     |
| HH                                     | 5,073       | 0.51152      | 1 (Reference)       | 1 (Reference)       | 19,101      | 1.51205      | 1 (Reference)       | 1 (Reference)       | 6,449       | 6.28945      | 1 (Reference)       | 1 (Reference)       |
| HU                                     | 1,450       | 0.66134      | 1.15 (1.08-1.223)   | 1.111(1.043-1.183)  | 8,928       | 2.27356      | 1.25 (1.216-1.284)  | 1.198 (1.166-1.232) | 5,975       | 8.05255      | 1.197 (1.152-1.243) | 1.163 (1.12-1.208)  |
| UH                                     | 1,349       | 0.67138      | 1.144(1.077-1.215)  | 1.107(1.042-1.183)  | 7,245       | 2.23839      | 1.271 (1.239-1.304) | 1.221 (1.189-1.252) | 4,776       | 7.78717      | 1.246 (1.202-1.291) | 1.216 (1.173-1.26)  |
| UU                                     | 2,573       | 0.98224      | 1.572 (1.494-1.654) | 1.469(1.392-1.549)  | 35,528      | 3.38305      | 1.609 (1.58-1.639)  | 1.484 (1.456-1.513) | 40,858      | 9.77971      | 1.492 (1.453-1.532) | 1.405 (1.367-1.443) |
| <b>Fasting glucose<sup>‡</sup></b>     |             |              |                     |                     |             |              |                     |                     |             |              |                     |                     |
| HH                                     | 6,458       | 0.54747      | 1 (Reference)       | 1 (Reference)       | 30,582      | 1.93989      | 1 (Reference)       | 1 (Reference)       | 22,182      | 8.2747       | 1 (Reference)       | 1 (Reference)       |
| HU                                     | 1,409       | 0.72439      | 1.331 (1.255-1.413) | 1.3 (1.225-1.38)    | 10,409      | 2.50077      | 1.106 (1.079-1.133) | 1.07 (1.045-1.096)  | 8,611       | 9.36199      | 1.07 (1.041-1.099)  | 1.049 (1.021-1.077) |
| UH                                     | 1,387       | 0.8039       | 1.182 (1.114-1.253) | 1.147 (1.082-1.217) | 8,769       | 2.40646      | 1.148 (1.122-1.174) | 1.106 (1.081-1.131) | 7,123       | 9.08472      | 1.101 (1.073-1.129) | 1.077 (1.05-1.104)  |
| UU                                     | 1,191       | 0.93601      | 1.394 (1.307-1.486) | 1.307 (1.224-1.395) | 21,042      | 3.12807      | 1.246 (1.224-1.269) | 1.159 (1.137-1.18)  | 20,142      | 9.26507      | 1.103 (1.82-1.125)  | 1.053 (1.033-1.074) |

|                                 |       |         |                      |                     |        |         |                     |                     |        |         |                     |                     |
|---------------------------------|-------|---------|----------------------|---------------------|--------|---------|---------------------|---------------------|--------|---------|---------------------|---------------------|
| <b>Triglyceride<sup>†</sup></b> |       |         |                      |                     |        |         |                     |                     |        |         |                     |                     |
| HH                              | 5,626 | 0.5325  | 1 (Reference)        | 1 (Reference)       | 28,775 | 1.92155 | 1 (Reference)       | 1 (Reference)       | 22,898 | 8.98813 | 1 (Reference)       | 1 (Reference)       |
| HU                              | 1,341 | 0.70408 | 1.151 (1.075-1.231)  | 1.086 (1.014-1.164) | 10,356 | 2.6466  | 1.061 (1.035-1.089) | 0.996 (0.97-1.021)  | 8,330  | 9.33748 | 0.998 (0.971-1.025) | 0.956 (0.93-0.983)  |
| UH                              | 1,063 | 0.7167  | 1.162 (1.093-1.235)  | 1.114 (1.047-1.186) | 7,896  | 2.39738 | 1.199 (1.172-1.227) | 1.142 (1.116-1.168) | 7,070  | 8.71894 | 1.089 (1.062-1.117) | 1.054 (1.027-1.081) |
| UU                              | 2,415 | 0.8669  | 1.288 (1.224-1.356)  | 1.176 (1.113-1.242) | 23,775 | 2.92924 | 1.22 (1.198-1.241)  | 1.106 (1.086-1.127) | 19,760 | 8.5617  | 1.015 (0.995-1.035) | 0.954 (0.935-0.973) |
| <b>HDL-C<sup>†</sup></b>        |       |         |                      |                     |        |         |                     |                     |        |         |                     |                     |
| HH                              | 7,499 | 0.58108 | 1 (Reference)        | 1 (Reference)       | 33,781 | 1.95646 | 1 (Reference)       | 1 (Reference)       | 22,778 | 8.76279 | 1 (Reference)       | 1 (Reference)       |
| HU                              | 1,121 | 0.83146 | 1.097 (1.02-1.18)    | 1.066 (0.99-1.146)  | 11,022 | 2.84024 | 1.16 (1.131-1.19)   | 1.12 (1.091-1.149)  | 9,240  | 9.55475 | 1.058 (1.029-1.088) | 1.034 (1.005-1.063) |
| UH                              | 843   | 0.64235 | 1.404 (1.317-1.496)  | 1.356 (1.446-1.271) | 7,474  | 2.34486 | 1.349 (1.319-1.378) | 1.296 (1.325-1.268) | 6,731  | 8.57183 | 1.177 (1.149-1.207) | 1.147 (1.119-1.176) |
| UU                              | 982   | 0.8372  | 1.373 (1.282-1.469)  | 1.305 (1.217-1.399) | 18,525 | 3.10643 | 1.387 (1.361-1.413) | 1.304 (1.279-1.33)  | 19,309 | 8.74973 | 1.132 (1.109-1.155) | 1.087 (1.064-1.109) |
| <b>Obesity</b>                  |       |         |                      |                     |        |         |                     |                     |        |         |                     |                     |
| HH                              | 6,008 | 0.54152 | 1 (Reference)        | 1 (Reference)       | 36,543 | 1.98538 | 1 (Reference)       | 1 (Reference)       | 32,530 | 8.38039 | 1 (Reference)       | 1 (Reference)       |
| HU                              | 710   | 0.67163 | 1.1 (0.99-1.221)     | 1.088 (0.979-1.208) | 4,180  | 2.5301  | 1.229 (1.189-1.269) | 1.225 (1.186-1.266) | 2,976  | 8.68753 | 1.185 (1.147-1.225) | 1.186 (1.148-1.226) |
| UH                              | 384   | 0.67865 | 1.136 (1.049-1.23)   | 1.13 (1.043-1.223)  | 4,132  | 2.72498 | 1.219 (1.18 -1.259) | 1.216 (1.177-1.256) | 4,147  | 9.56372 | 1.086 (1.045-1.128) | 1.086 (1.045-1.128) |
| UU                              | 3,343 | 0.83133 | 1.294 (1.237 -1.353) | 1.279 (1.223-1.338) | 25,947 | 2.97442 | 1.361 (1.339-1.383) | 1.354 (1.332-1.376) | 18,405 | 9.68347 | 1.265 (1.241-1.288) | 1.266 (1.243-1.29)  |

\* The associations were tested using a Cox proportional hazards model adjusted for multivariable.

Model 1: adjusted for age, sex

Model 2: adjusted for age, sex, alcohol consumption, smoking status, physical activity, and BMI. <sup>†</sup>Subjects stratified into four groups according to the change of metabolic syndrome status as follows: MM, patients who were in MetS in both health checkups; HM, healthy in first checkup but newly diagnosis as MetS in the second checkup; MH, MetS in the first exam but changed to healthy in the second checkup; and HH, healthy in both checkups. <sup>‡</sup>The components of metabolic syndrome were defined based on the AHA/NHLBI definitions for Asian populations as follows: 1) waist circumference  $\geq 85$  cm in women or  $\geq 90$  cm in men, 2) serum triglycerides  $\geq 150$  mg/dL, 3) serum high-density lipoprotein (HDL) cholesterol  $< 50$  mg/dL in women or  $< 40$  mg/dL in men, 4) systolic BP  $\geq 130$  mmHg or diastolic BP  $\geq 85$  mmHg or drug treatment for elevated BP, and 5) fasting serum glucose  $\geq 100$  mg/dL or drug treatment for elevated blood glucose. Subjects stratified into four groups according to the change of relevant component of metabolic syndrome as follows: UU, metabolically unhealthy of relevant component in both checkups; UH, metabolically unhealthy of relevant component in the first exam but changed to healthy in the second checkup; HU, metabolically healthy of relevant component in the first exam but changed to unhealthy in the second checkup; and HH, metabolically healthy of relevant component in both checkups. AF, atrial fibrillation; AHA/NHLBI, American Heart Association/National Heart, Lung, and Blood Institute; BP, blood pressure; HR, hazard ratio; HDL-C, high-density lipoprotein cholesterol; MetS, metabolic syndrome

Figure S1. Study population stratified flow according to the change of each component of metabolic syndrome.

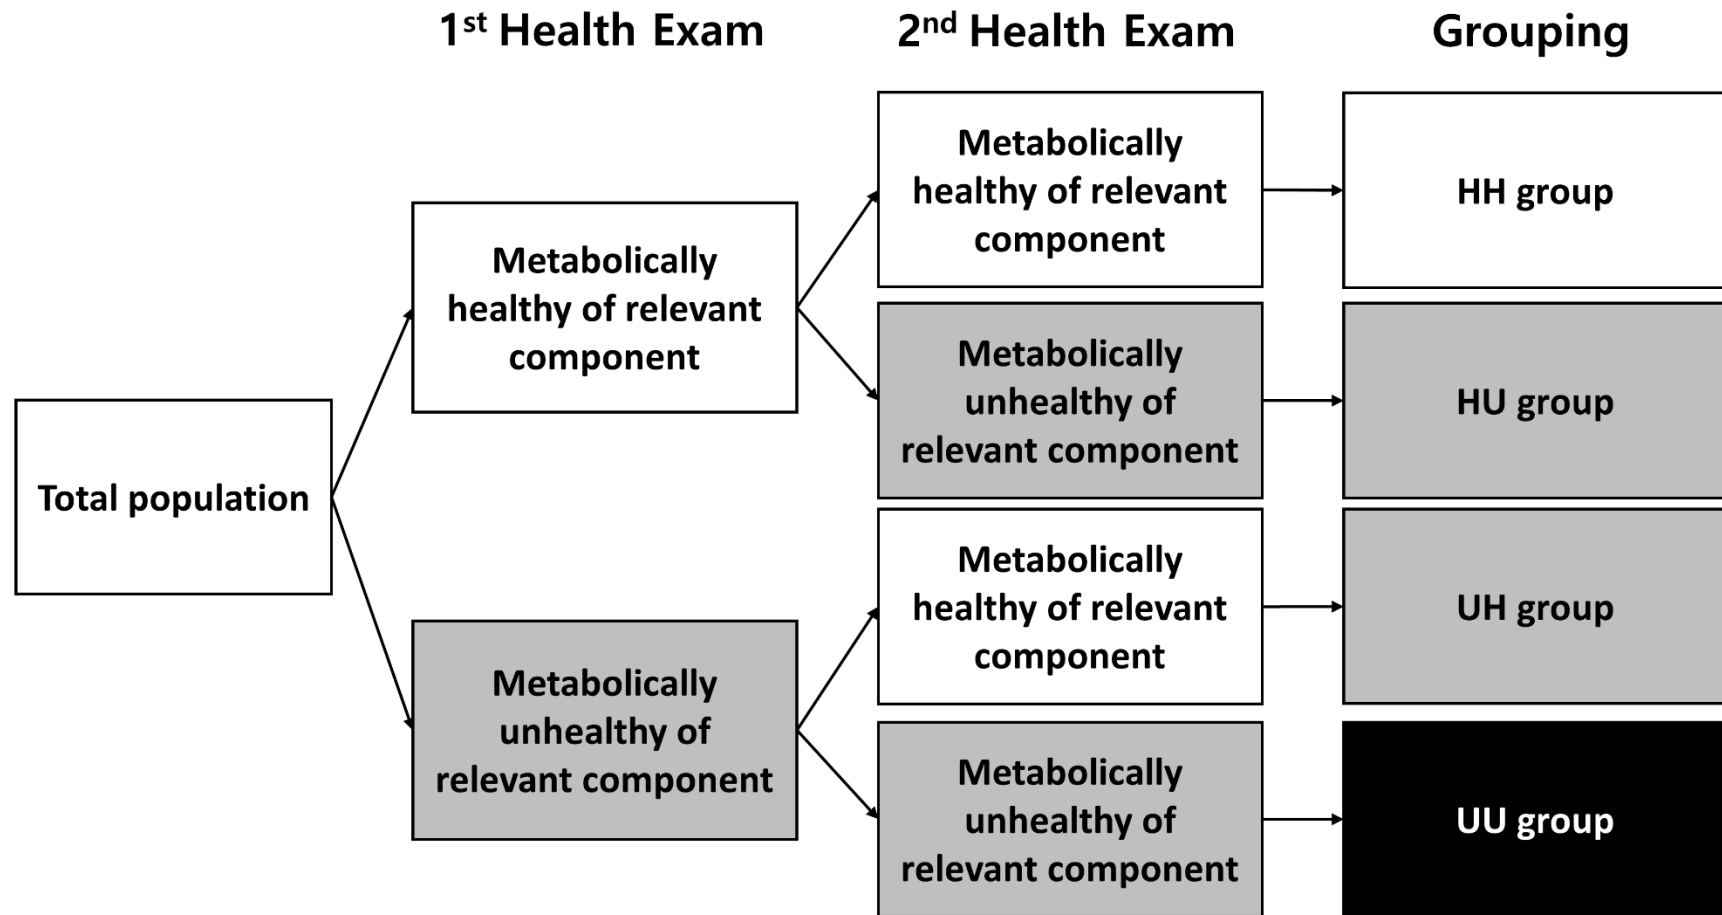

Supplement: JAH3-10-e020901-s001.pdf [file JAH3-10-e020901-s001.pdf]
